# Supplementary material
Source: publisher figshare collection journal article supplement (https://frontiersin.figshare.com/ndownloader/files/22823021)
Supplement: Supplementary file 1 [file 22823021]

# Supplementary Material

## 1 FIGURES

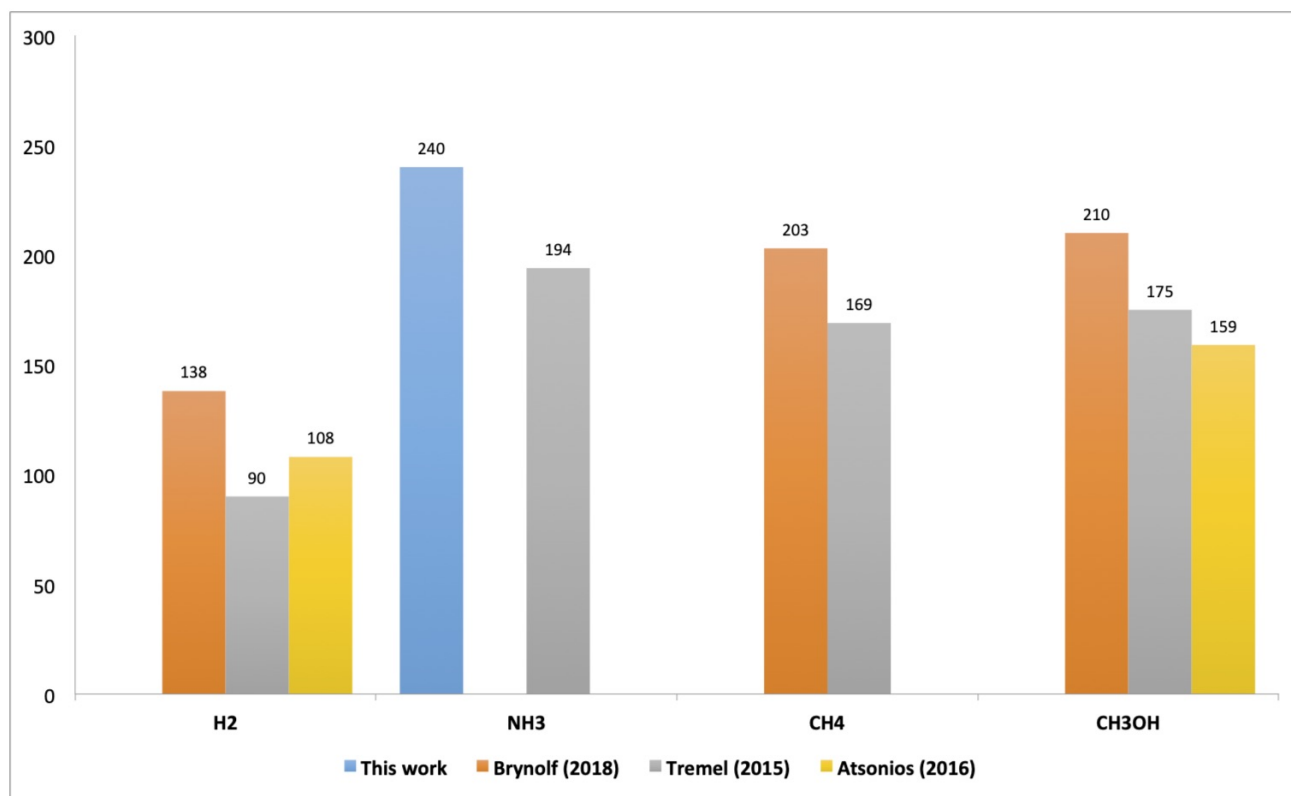

**Figure S1.** Production costs for each fuel in  $/\text{MWh}_{fuel}$  - based on (Brynolf et al., 2018; Atsonios et al., 2016; Tremel et al., 2015)

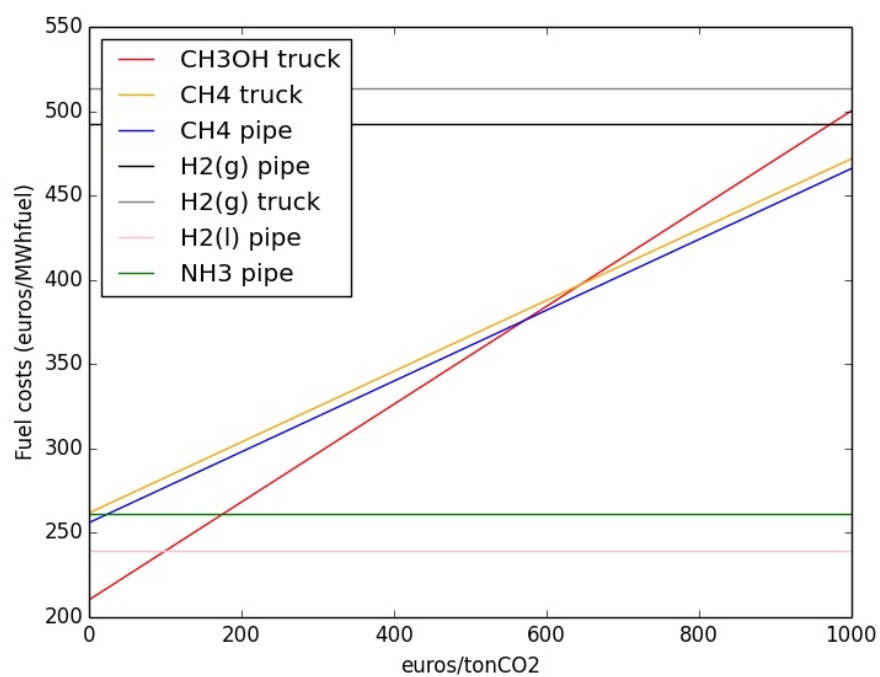

**Figure S2.** Fuel costs (production, conversion, storage, transport) in /MWh<sub>fuel</sub> according to the CO<sub>2</sub> costs

## REFERENCES

- Atsonios, K., Panopoulos, K. D., and Kakaras, E. (2016). Investigation of technical and economic aspects for methanol production through CO<sub>2</sub> hydrogenation. *International Journal of Hydrogen Energy* 41, 2202–2214. doi:10.1016/j.ijhydene.2015.12.074
- Brynolf, S., Taljegard, M., Grahn, M., and Hansson, J. (2018). Electrofuels for the transport sector: A review of production costs. *Renewable and Sustainable Energy Reviews* 81, 1887–1905. doi:10.1016/j.rser.2017.05.288
- Tremel, A., Wasserscheid, P., Baldauf, M., and Hammer, T. (2015). Techno-economic analysis for the synthesis of liquid and gaseous fuels based on hydrogen production via electrolysis. *International Journal of Hydrogen Energy* 40, 11457–11464. doi:10.1016/j.ijhydene.2015.01.097
